# Supplementary material for: Development of a membrane solid-phase extraction method based on polyethyleneimine modified MWNTs for on-line extraction and preconcentration of acidic proteins in serum samples
Source: Royal Society of Chemistry journal article supplement (doi:10.1039/c3ay40963e), 2013-01-01
Supplement: c3ay40963e.pdf [file c3ay40963e.pdf]

## Supplementary Material

# Development of a Membrane Solid-phase Extraction Method Based on Polyethyleneimine Modified MWNTs for On-line Extraction and Preconcentration of Acidic Proteins in Serum Samples

Zhuo Du, Miao Liu, Gongke Li\*

School of Chemistry and Chemical Engineering, Sun Yat-sen University, Guangzhou, 510275, China

\* Corresponding author: Gongke Li.

Tel: +86-20-84110922

Fax: +86-20-84115107

E-mail: cesgkl@mail.sysu.edu.cn;

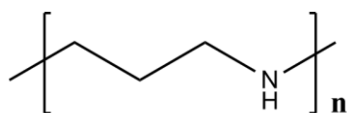

**Fig. S-1** Structural formula of PEI.

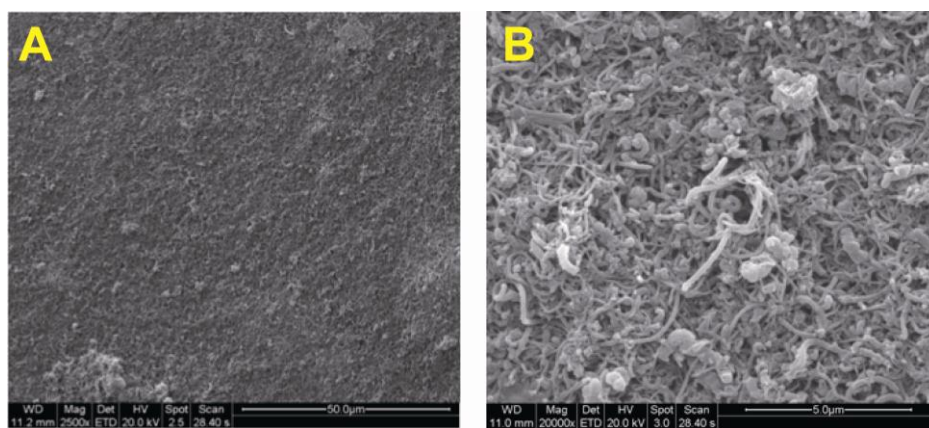

**Fig. S-2** Scanning electron micrographs of the surface of PEI-MWCNTs composite layer magnified (A) 2500 and (B) 20000 times.

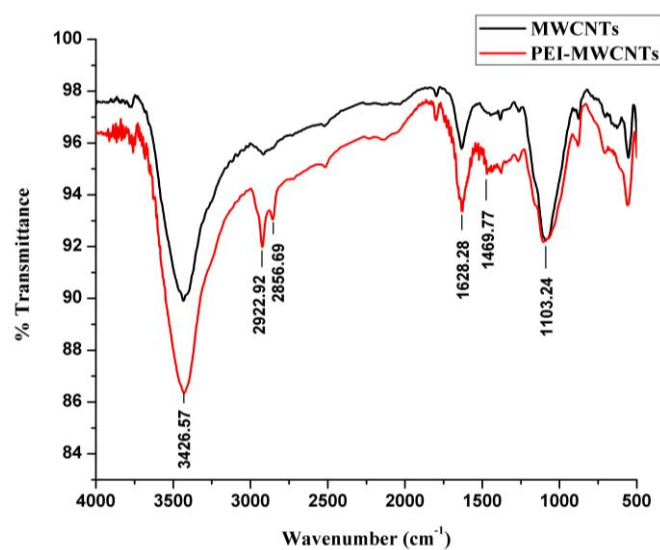

**Fig. S-3** FTIR spectra of raw MWCNTs and PEI-MWNTs.

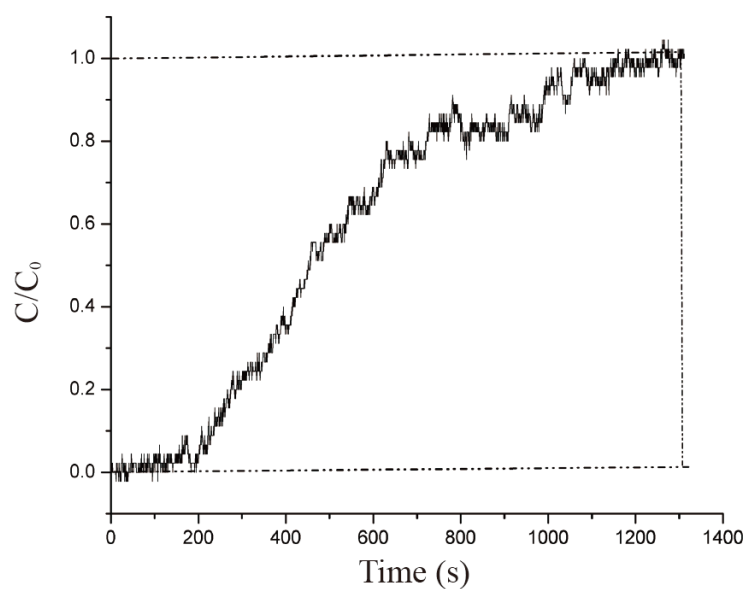

**Fig. S-4** Kinetic curve of BSA adsorption on the PEI-MWCNTs membrane. Concentration of BSA: 50 µg/mL; flow rate of sampling: 18 µL/s.
